# Supplementary material
Source: PubMed Central journal article supplement (PMC8020009)
Supplement: NIHMS1663134-supplement-Supplementary_data.pdf [file NIHMS1663134-supplement-Supplementary_data.pdf]

Fig S1

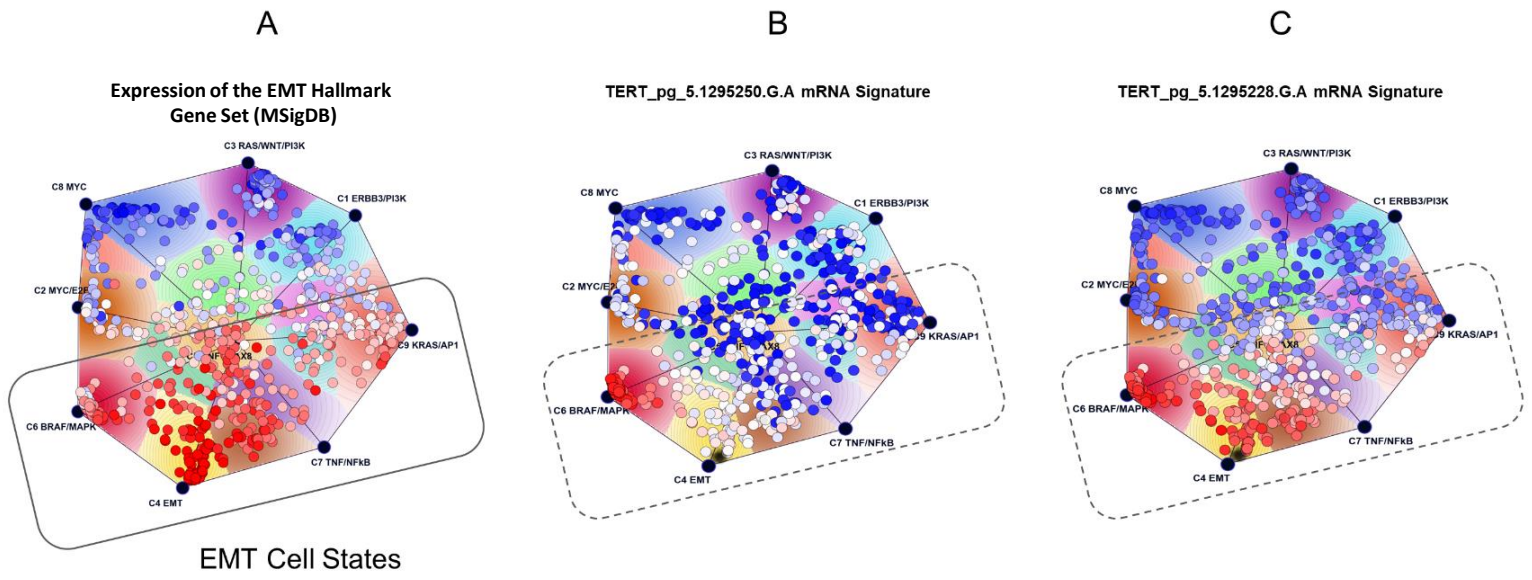

Figure S1. Projecting the individual TERTp mutations transcriptional signatures on top of the Onco-GPS map of cellular states (Kim et al. 2017).

# Fig S2

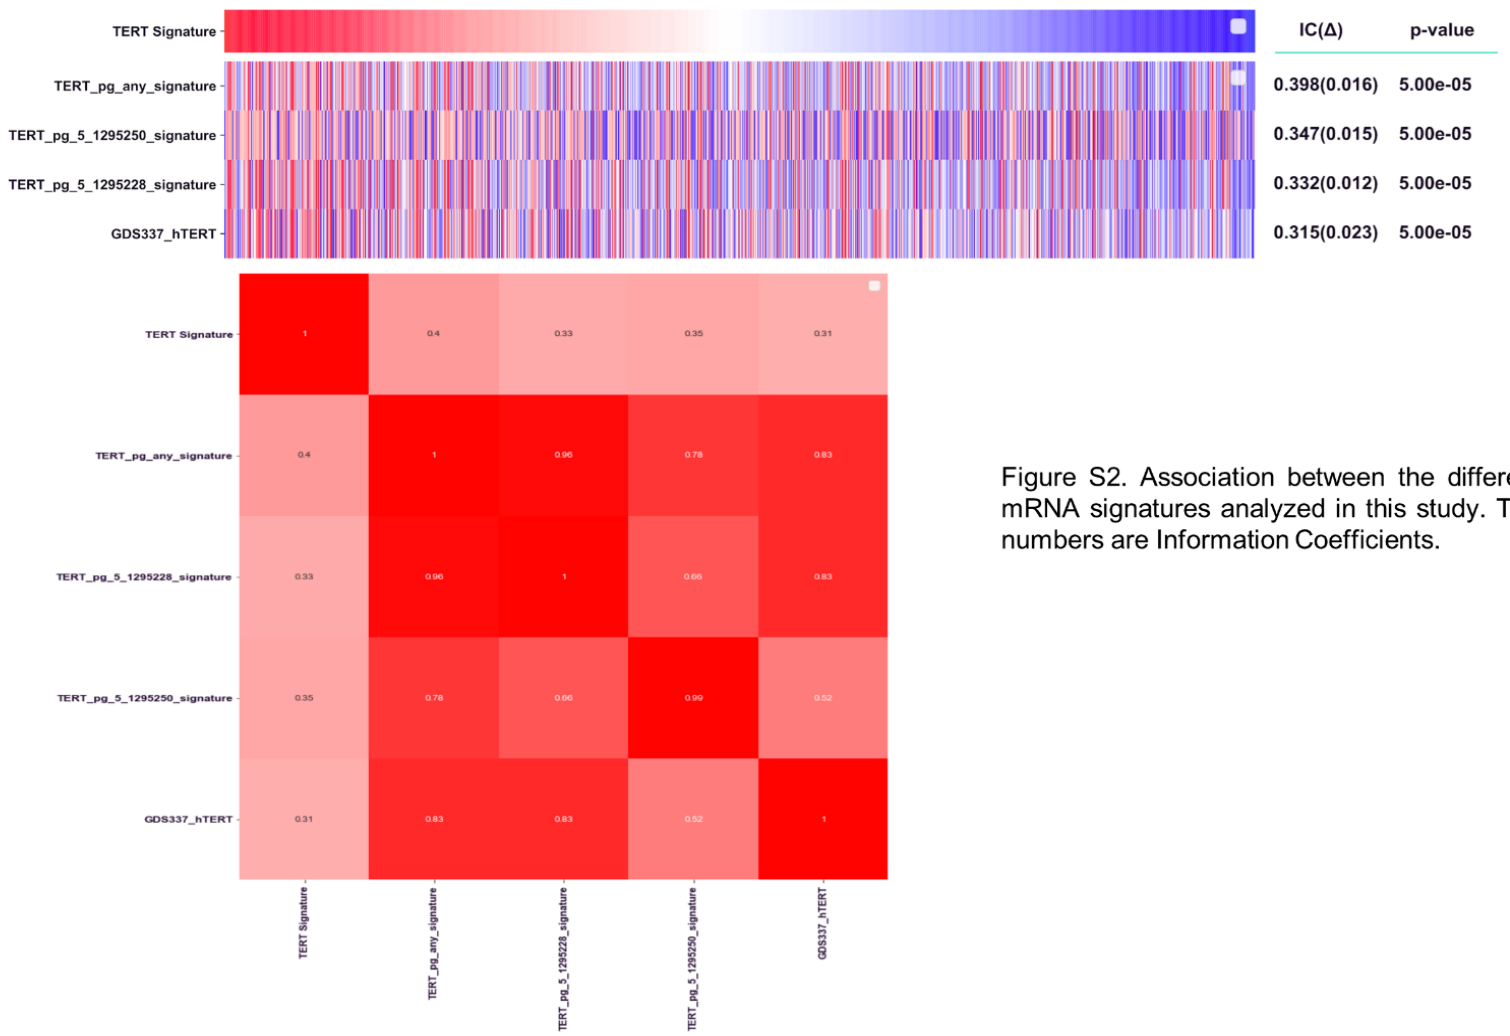

Figure S2. Association between the different mRNA signatures analyzed in this study. The numbers are Information Coefficients.

Fig S3A

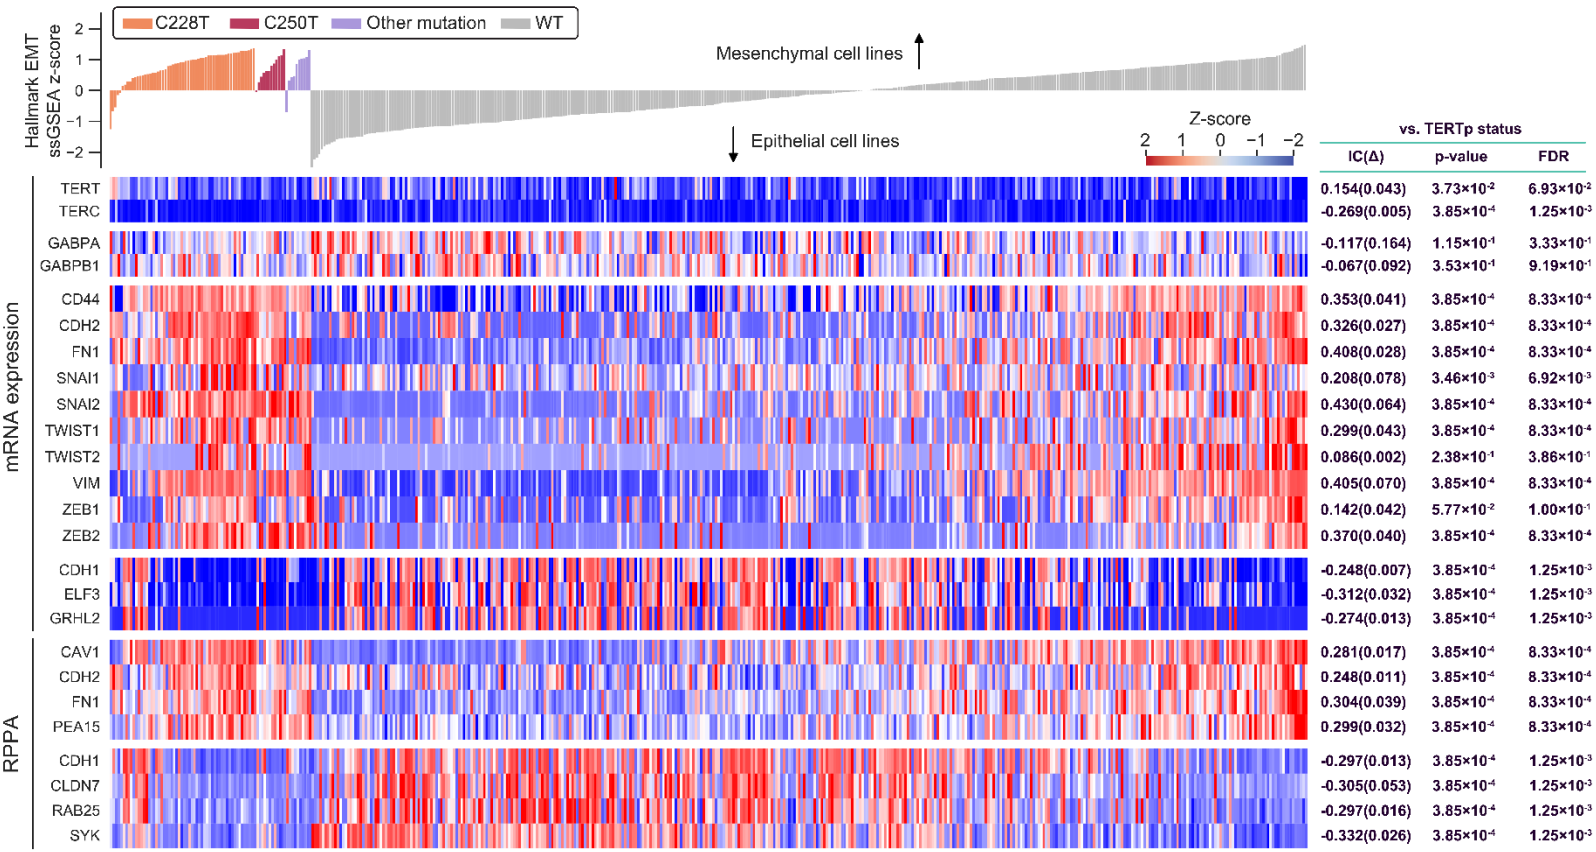

Fig S3B

Epithelial marker genes

Mesenchymal marker genes

CDH1 ( $p = 2.9 \times 10^{-8}$ )

FN1 ( $p = 5.8 \times 10^{-8}$ )

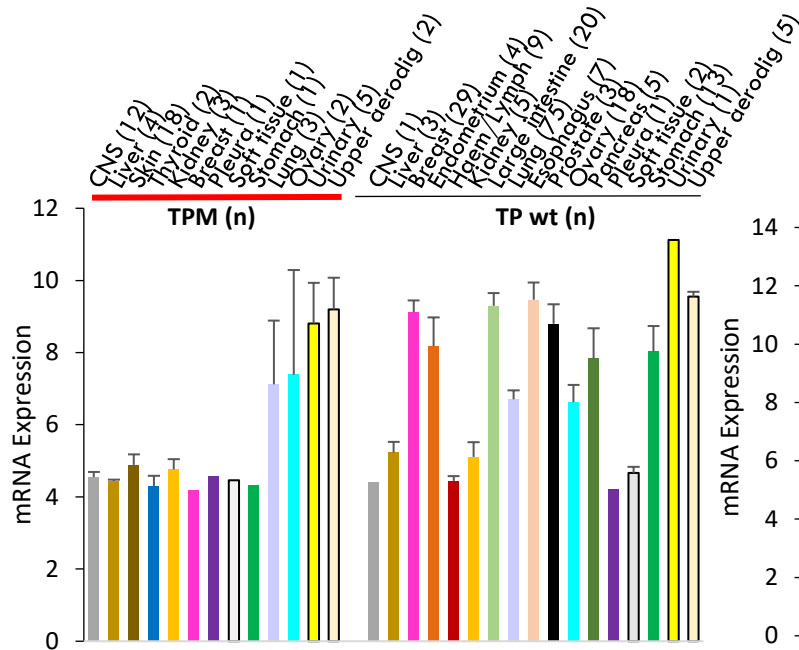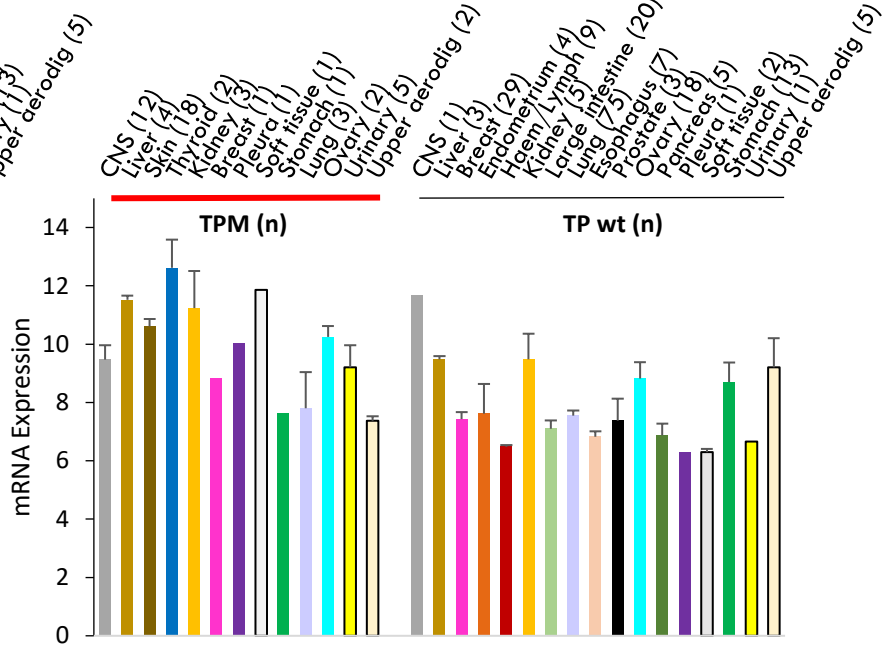

GRHL2 ( $p = 7.8 \times 10^{-10}$ )

VIM ( $p = 6.1 \times 10^{-12}$ )

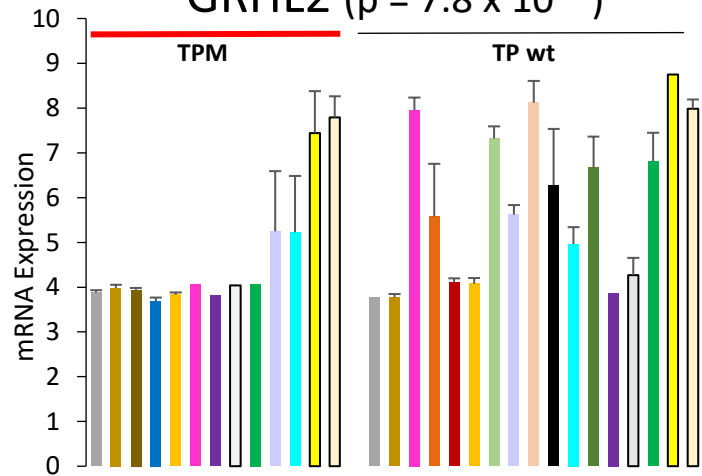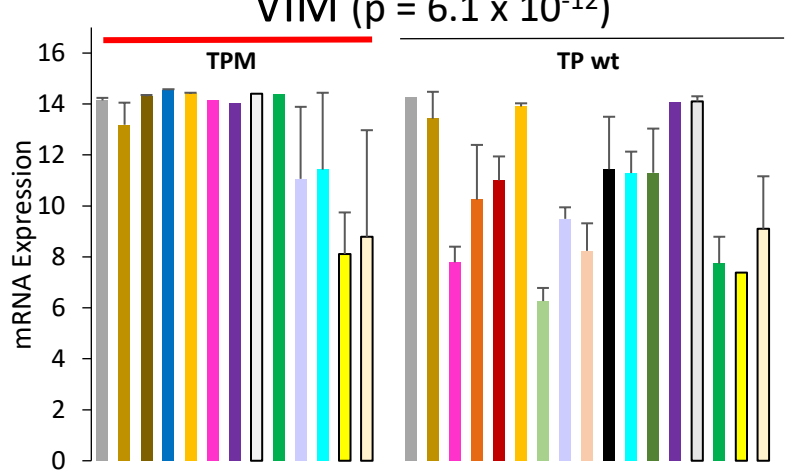

ELF3 ( $p = 4.7 \times 10^{-15}$ )

CDH2 ( $p = 4.8 \times 10^{-8}$ )

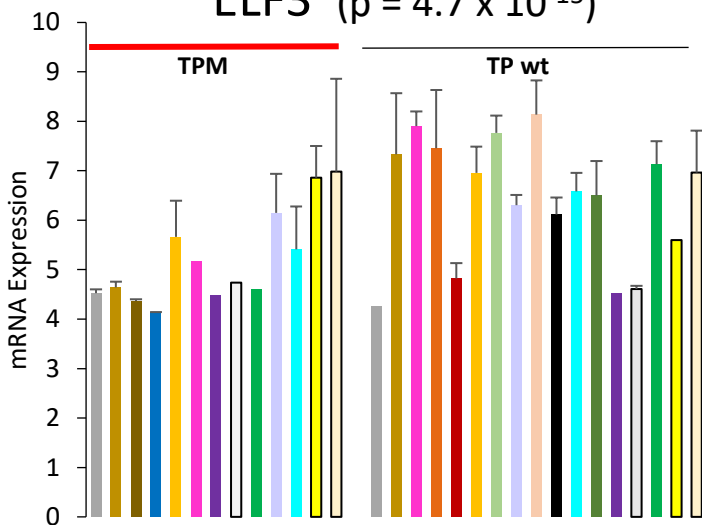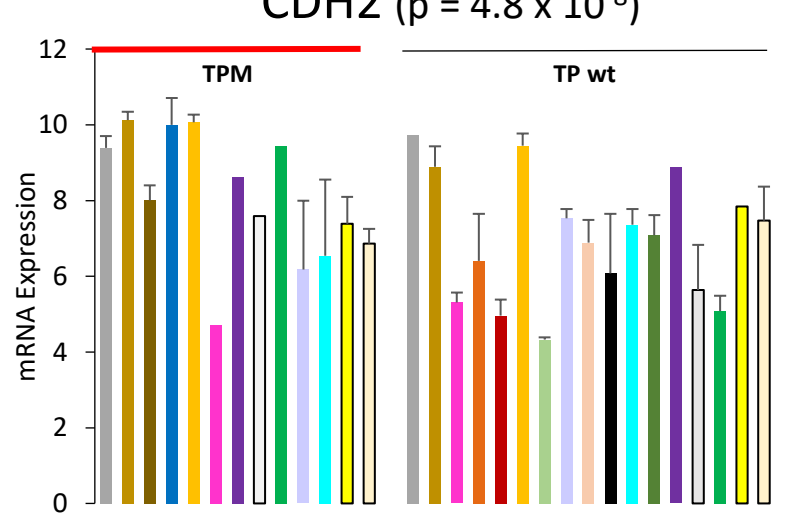

Fig S3C

Epithelial marker proteins

CDH1 ( $p = 9 \times 10^{-7}$ )

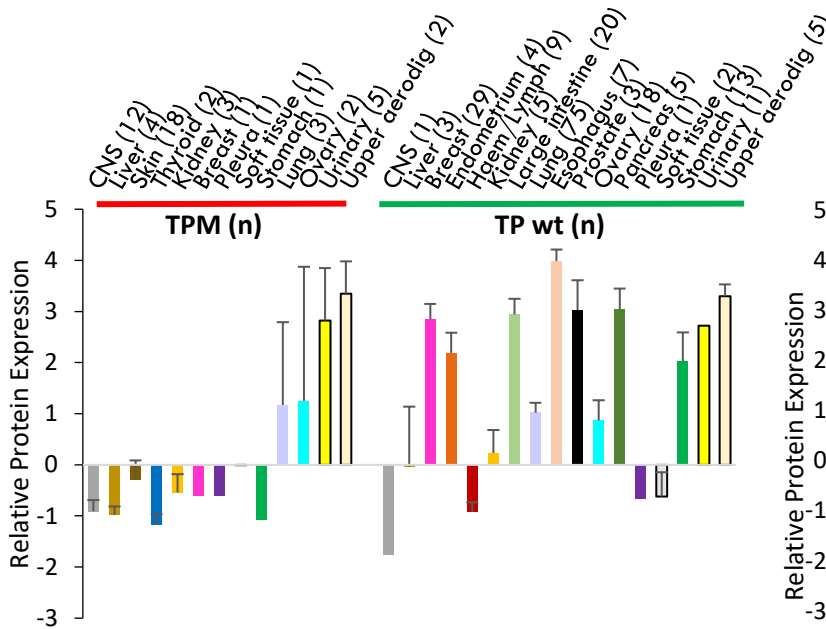

Mesenchymal marker proteins

FN1 ( $p = 1.7 \times 10^{-8}$ )

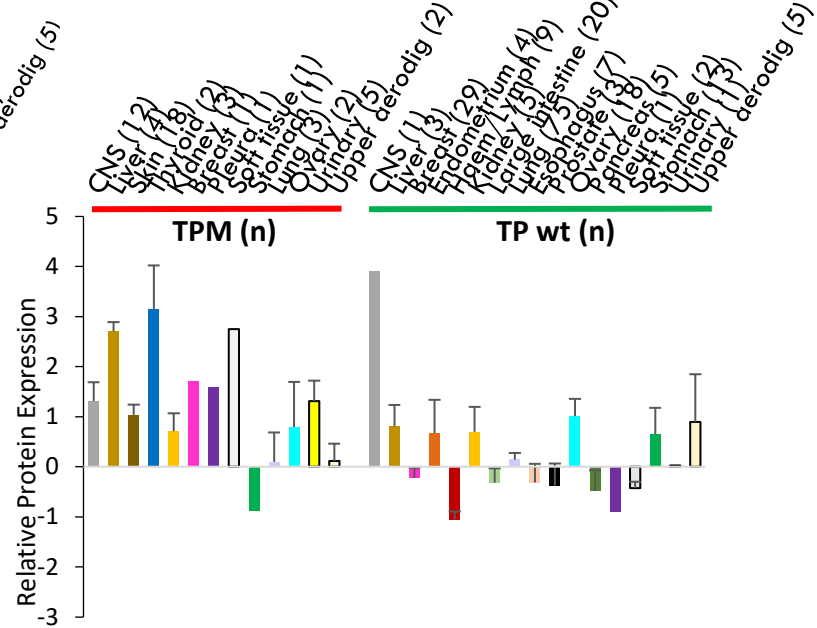

CLDN7 ( $p = 1.5 \times 10^{-9}$ )

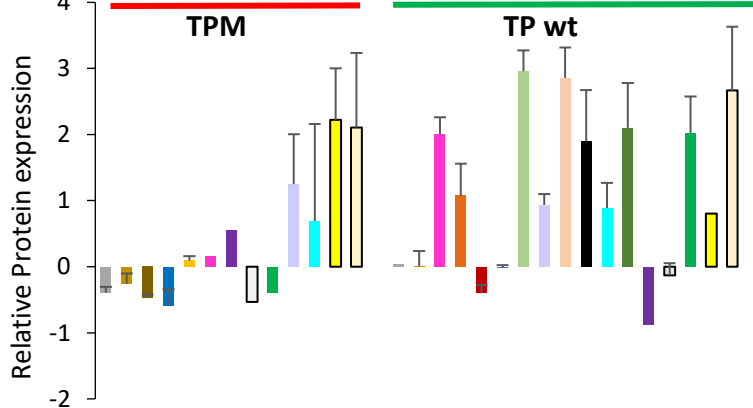

CDH2 ( $p = 6.1 \times 10^{-6}$ )

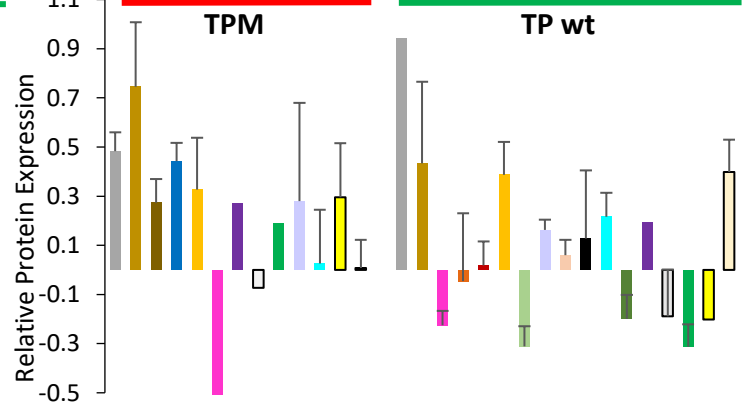

D.

Patient HCC

Patient skin melanomas

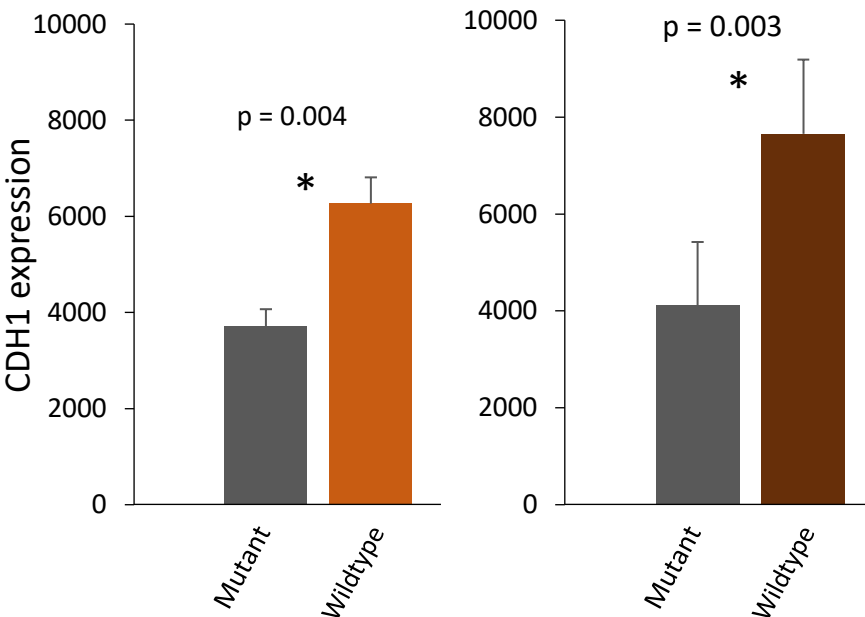

Fig S3. Expression of epithelial and mesenchymal markers in TERTp mutants (TPM) and wild-type (wt) cancer cell lines. (A) EMT markers arranged by TERTp mutation. See Fig 3 for full description. (B) Differences in expression of genes according to tissue type of origin for CCLE cell lines. (C) Differences in expression of proteins according to tissue type of origin for CCLE cell lines. (D) E-cadherin gene (*CDH1*) mRNA expression in TERTp mutant vs TERTp wild-type clinical tumor samples of liver cancer and melanoma. TPM, TERTp mutant; TP wt, wild-type lines. Skin = melanoma.

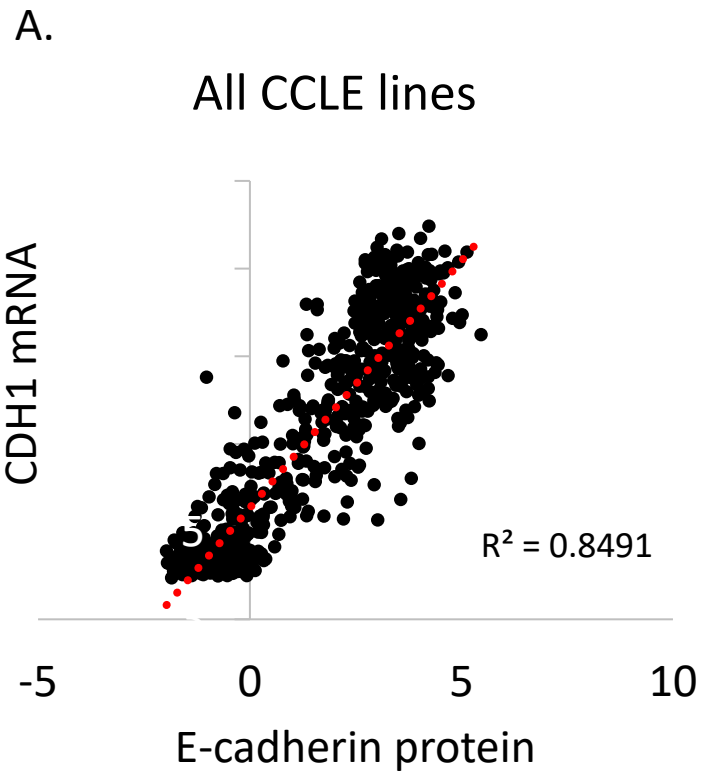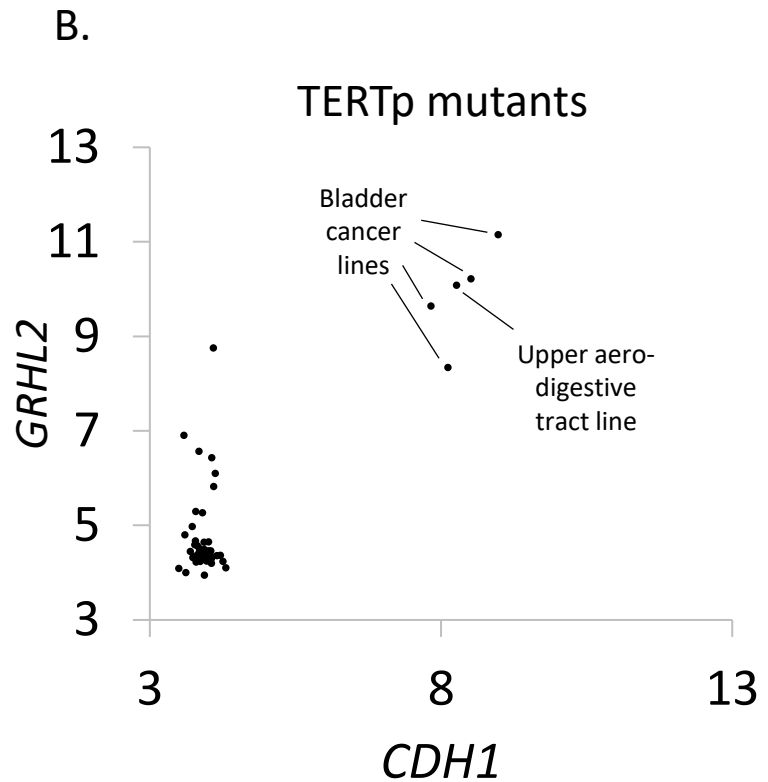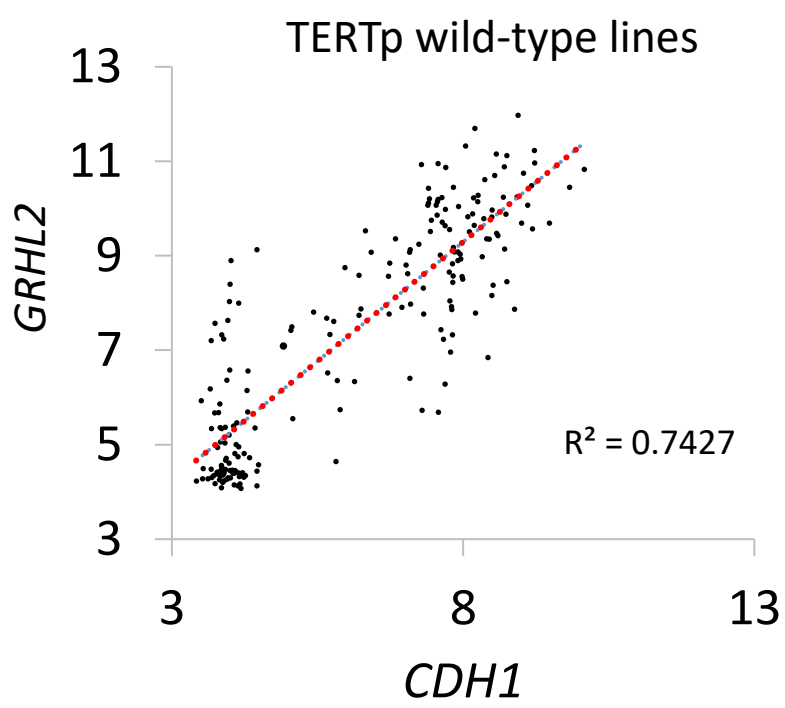

Fig S4. CDH1 expression levels in CCLE lines. (A) Correlation between CDH1 gene expression and E-cadherin protein for all CCLE lines. (B) Relationship between CDH1 and GRHL2 gene expression in CCLE lines separated by TERTp status.

Fig S5

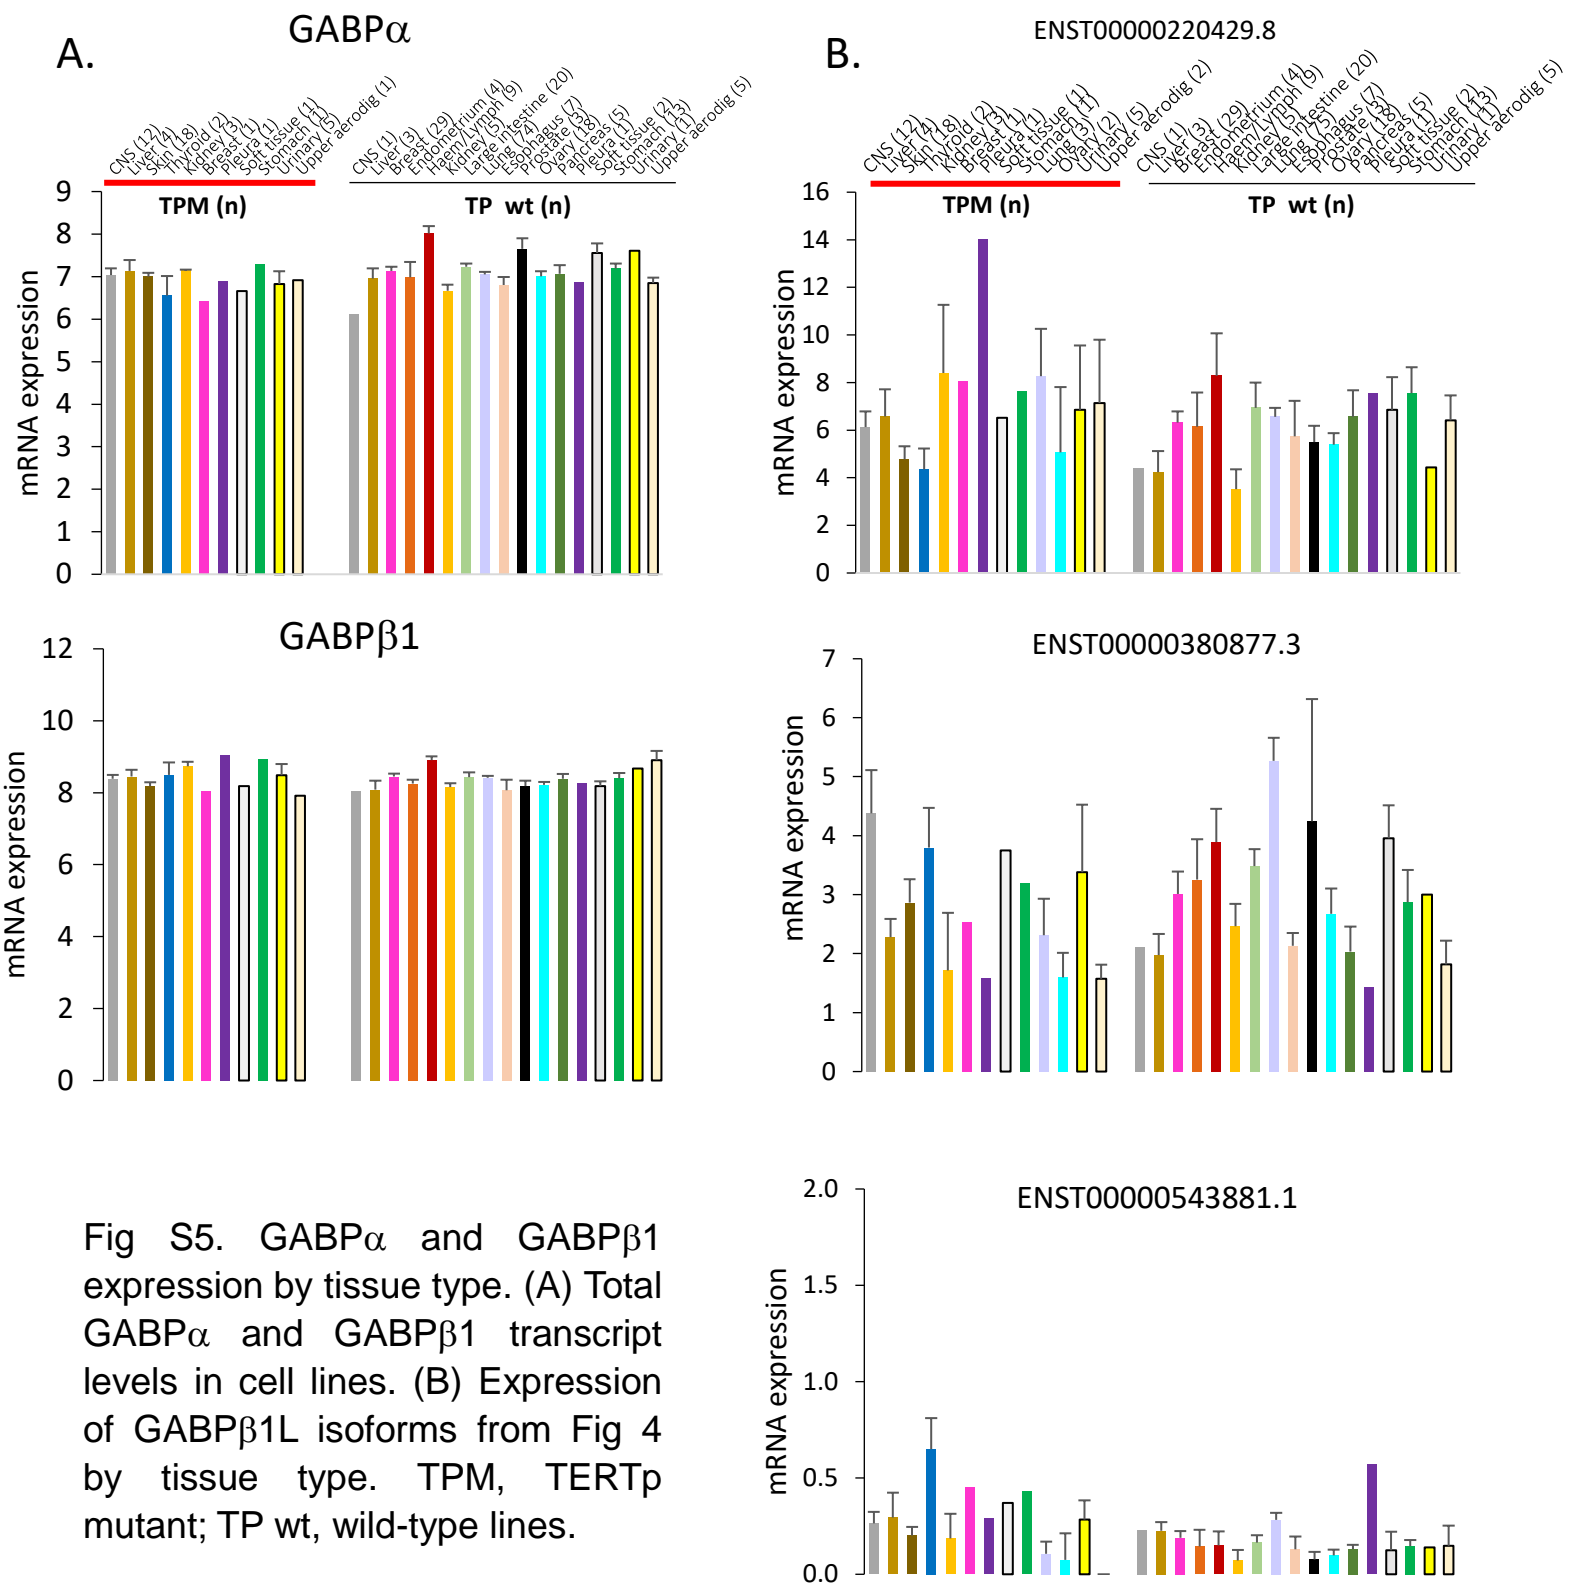

Fig S5. GABP $\alpha$  and GABP $\beta$ 1 expression by tissue type. (A) Total GABP $\alpha$  and GABP $\beta$ 1 transcript levels in cell lines. (B) Expression of GABP $\beta$ 1L isoforms from Fig 4 by tissue type. TPM, TERTp mutant; TP wt, wild-type lines.

| ccl_class                 | ccl     | lineage             | apparent_ec50_umol | log2_ec50   | cpd_name   | BRAF_status       | log2_ec50   |
|---------------------------|---------|---------------------|--------------------|-------------|------------|-------------------|-------------|
| SKIN                      | IGR39   | melanoma            | 1.23E-09           | 1.77E-09    | dabrafenib | missense_mutation | 1.77E-09    |
| SKIN                      | UACC257 | melanoma            | 0.0006078          | 0.000876604 | dabrafenib | missense_mutation | 0.000876604 |
| SKIN                      | SKMEL24 | melanoma            | 0.0007939          | 0.001144901 | dabrafenib | missense_mutation | 0.001144901 |
| SKIN                      | HT144   | melanoma            | 0.0009089          | 0.00131067  | dabrafenib | missense_mutation | 0.00131067  |
| SKIN                      | WM2664  | melanoma            | 0.0009455          | 0.001363424 | dabrafenib | missense_mutation | 0.001363424 |
| SKIN                      | WM2664  | melanoma            | 0.0009455          | 0.001363424 | dabrafenib | missense_mutation | 0.001363424 |
| SKIN                      | HS294T  | melanoma            | 0.001155           | 0.001665351 | dabrafenib | missense_mutation | 0.001665351 |
| SKIN                      | COLO829 | melanoma            | 0.001309           | 0.001887253 | dabrafenib | missense_mutation | 0.001887253 |
| SKIN                      | A101D   | melanoma            | 0.003024           | 0.004356127 | dabrafenib | missense_mutation | 0.004356127 |
| SKIN                      | LOXIMVI | melanoma            | 2.102              | 1.633198686 | dabrafenib | missense_mutation | 1.633198686 |
| SKIN                      | A2058   | melanoma            | 2.159              | 1.659467937 | dabrafenib | missense_mutation | 1.659467937 |
| CENTRAL_NERVOUS_SYSTEM    | GI1     | glioma              | 0.003343           | 0.004814886 | dabrafenib | wildtype          | 0.004814886 |
| CENTRAL_NERVOUS_SYSTEM    | U251MG  | glioma              | 0.01942            | 0.027748563 | dabrafenib | wildtype          | 0.027748563 |
| LIVER                     | SNU475  | liver               | 0.02138            | 0.030519715 | dabrafenib | wildtype          | 0.030519715 |
| SKIN                      | SKMEL2  | melanoma            | 0.08481            | 0.117442383 | dabrafenib | wildtype          | 0.117442383 |
| LIVER                     | SNU423  | liver               | 0.1393             | 0.188147687 | dabrafenib | wildtype          | 0.188147687 |
| URINARY_TRACT             | T24     | urinary_tract       | 0.1794             | 0.238053099 | dabrafenib | wildtype          | 0.238053099 |
| KIDNEY                    | 786O    | kidney              | 0.2125             | 0.277984747 | dabrafenib | wildtype          | 0.277984747 |
| URINARY_TRACT             | SCABER  | urinary_tract       | 0.2541             | 0.326652391 | dabrafenib | wildtype          | 0.326652391 |
| LIVER                     | SNU387  | liver               | 0.5177             | 0.601886645 | dabrafenib | wildtype          | 0.601886645 |
| STOMACH                   | SH10TC  | stomach             | 0.5833             | 0.66293464  | dabrafenib | wildtype          | 0.66293464  |
| THYROID                   | SW579   | thyroid             | 1.182              | 1.125651102 | dabrafenib | wildtype          | 1.125651102 |
| CENTRAL_NERVOUS_SYSTEM    | SW1783  | glioma              | 3.983              | 2.317014574 | dabrafenib | wildtype          | 2.317014574 |
| UPPER_AERODIGESTIVE_TRACT | CAL27   | upper_aerodigestive | 42.93              | 5.457134594 | dabrafenib | wildtype          | 5.457134594 |
| LUNG                      | CALU1   | lung_NSC            | 313                | 8.294620749 | dabrafenib | wildtype          | 8.294620749 |

## Response to dabrafenib in TERTp mutant lines with wild-type vs mutant BRAF

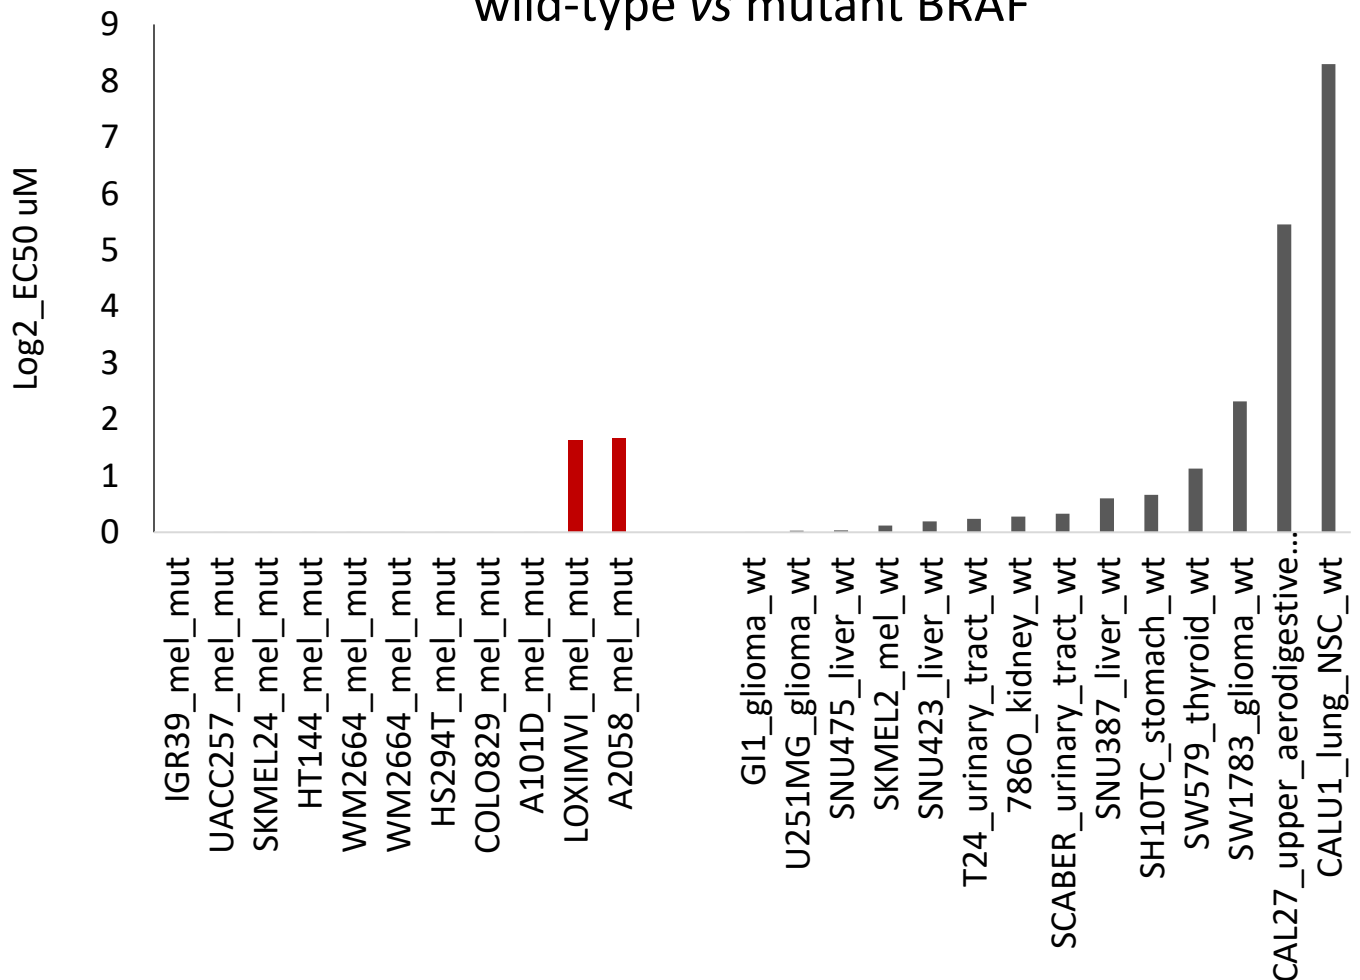

Fig S6. Stratification of TERTp mutant cell lines in The Cancer Therapeutics Response Portal (CTRP) by BRAF status reveals inhibition of growth in the absence of BRAF mutation. (A) Cell lines with growth data following dabrafenib treatment and their BRAF status. (B) Graphical representation of data from (A). Skin, mel = melanoma.



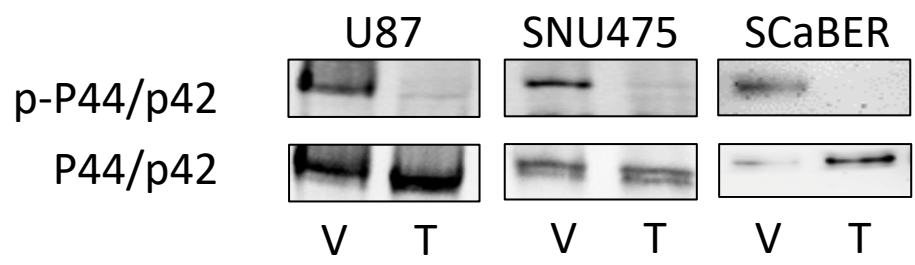

Fig. S7. Representative immunoblots of *TERT* promoter cell lines treated with trametinib for 24 hours. ERK1/2 (P42/p44). p-, phosphorylated form. V = vehicle, T = 250 nM trametinib 24 h

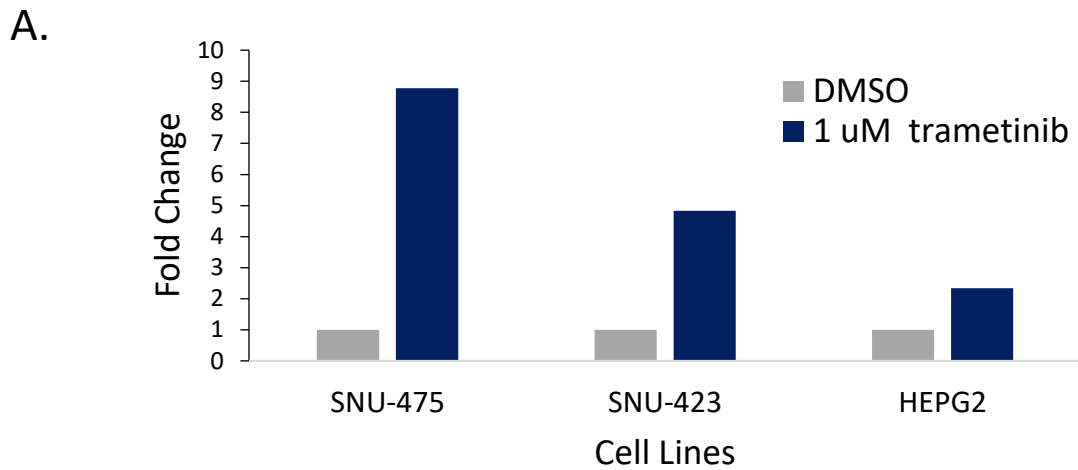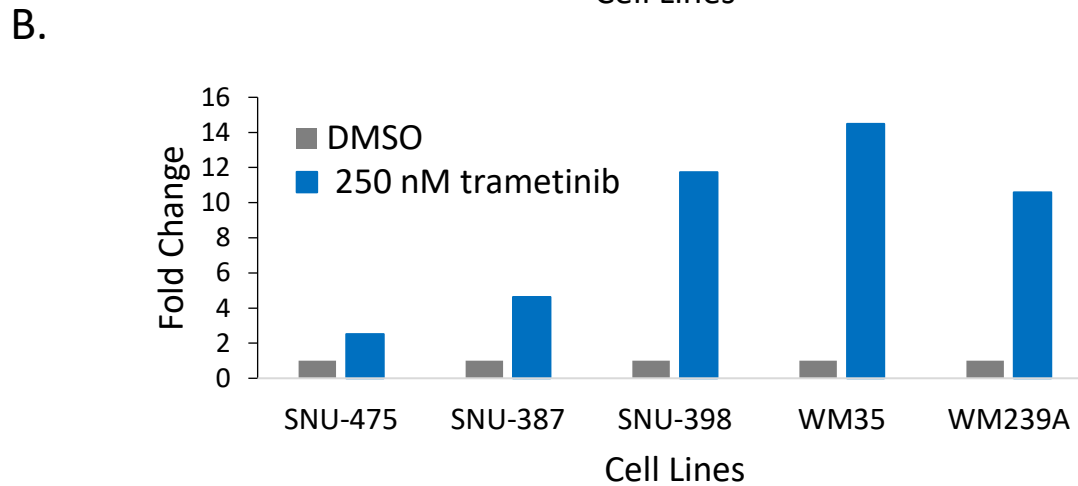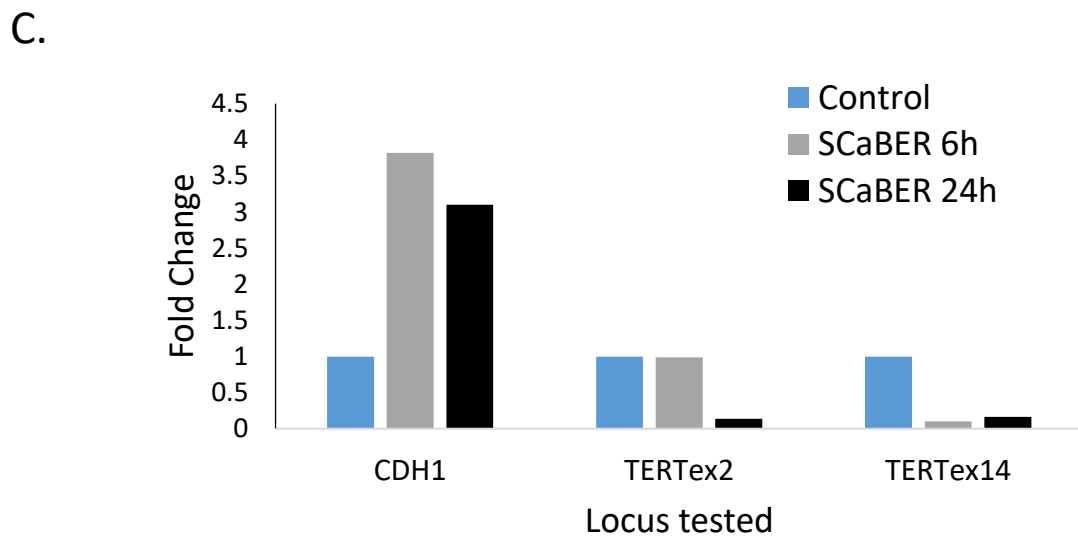

Fig. S8. Trametinib increases CDH1 expression in TERTp mutants. (A) CDH1 mRNA expression after 1 uM trametinib in TERTp mutant liver cancer cells. (B) CDH1 mRNA expression after 250 nM trametinib in TERTp mutant liver cancer cells SNU-475, SNU-387, SNU-398, and melanoma lines WM35 and WM239A. (C) CDH1 and TERT mRNA expression following 6h and 24h trametinib treatment. TERTex2, TERT exon 2 mRNA levels; TERTex14, TERT exon 14 mRNA levels.
